# Supplementary material for: SMC5/6 is required for replication fork stability and faithful chromosome segregation during neurogenesis
Source: eLife. 2020 Nov 17;9:e61171. doi: 10.7554/eLife.61171 (PMC7723410; doi:10.7554/eLife.61171)
Supplement: Supplementary file 1. [file elife-61171-supp1.xlsx]

## Sheet: Sheet1
Supplementary File 1: Primers used in this study.
Target	Forward Primer (5'-3')	Reverse Primer (5'-3')	Fragment size(s)
Smc5 WT and flox	ACTCAGTCTCACACGGCAAG	ATCCTTCCCACCTTGGAAAC	410 bp (WT), 563 bp (flox)
Smc5 flox	AGAAAGACATCAAACTAACCGCTGGC	GAGATGGCGCAACGCAATTAAT	644 bp
Smc5 del	ACTCAGTCTCACACGGCAAG	GAGATGGCGCAACGCAATTAAT	763 bp
Trp53 WT	TGGATGGTGGTATACTCAGAGC	AGGCTTAGAGGTGCAAGCTG	321 bp
Trp53 mutant	TGGATGGTGGTATACTCAGAGC	CAGCCTCTGTTCCACATACACT	110 bp
Chek2 WT	CTCCTGCCTGCCTCAAATAC	GCACACACCTTTAATCCCAATAC	310 bp
Chek2 mutant	CAGCGCTTATCCCAACACT	CGGTCGCTACCATTACCAGT	432 bp
53bp1 WT	CTCCAGAGAGAACCCAGCAG	GAACTTGGCTCACACCCATT	446 bp
53bp1 mutant	GAACTTGGCTCACACCCATT	CTAAAGCGCATGCTCCAGAC	500 bp
Emx1-Cre/Nestin-Cre	ATGGATTTCCGTCTCTGG	TTGCCCCTGTTTCACTAT	335 bp
Cpxm1 (internal control)	ACTGGGATCTTCGAACTCTTTGGAC	GATGTTGGGGCACTGCTCATTCACC	420 bp
