# Supplementary material for: SMC5/6 is required for replication fork stability and faithful chromosome segregation during neurogenesis
Source: eLife. 2020 Nov 17;9:e61171. doi: 10.7554/eLife.61171 (PMC7723410; doi:10.7554/eLife.61171)
Supplement: Supplementary file 2. [file elife-61171-supp2.xlsx]

## Sheet: Supplementary Table 2
Supplementary file 2: Antibodies used in this study.
Antibody target	Host	Source	Cat. Number	IHC Dilution	IHC antigen retrieval	ICC Dilution	WB Dilution
Primary antibodies
Beta-actin	mouse	Santa Cruz	sc-47778				1:500-1000
BrdU	rat	Abcam	ab6326	1:600	Yes
Centromere	human	Antibodies Inc.	15-235			1:50
Cleaved Caspase-3	rabbit	Cell Signaling Technologies	#9664 (5A1E)	1:400	Yes
Ctip2	rat	Abcam	ab18465	1:500	Yes
FANCD2	rabbit	Novus	NB100-182			1:800
H3S10p	rabbit	Millipore	06-570	1:250-600	Yes and No	1:600
H3S10p	mouse	Abcam	14955	1:300-600	Yes and No
H4K20 (dimethyl K20, trimethyl K20)	mouse	Abcam	ab78517			1:500
IdU	mouse	Becton Dickinson	347580			1:40
Ki67	rabbit	Cell Signaling Technologies	9129S	1: 500	Yes
Acetyl-p53	rabbit	Cell Signaling Technologies	2570	1:600			1:1000
Phospho-p53	mouse	Santa Cruz	sc-51690			1:100	1:500
Pax6	rabbit	BioLegend	901301 (PRB-278P)	1:300	Yes
Rad51	mouse	ThermoFisher	MA5-14419				1:200
Satb2	rabbit	Abcam	ab34735	1:2000	Yes
Smc5	rabbit	Novus	100-469				1:400
Smc6	rabbit	Abcam	ab18039				1:400
Sox2	rabbit	Stemgent	09-0024	1:300	Yes
Tbr1	rabbit	Abcam	ab31940	1:800	Yes
Tbr2	rat	ThermoFisher	12-4875-82	1:2000	Yes
Secondary antibodies
Mouse IgG, Alexa Fluor 488	Goat	Invitrogen	A-11001	1:1000		1:200
Mouse IgG, Alexa Fluor 568	Goat	Invitrogen	A-11031	1:1000		1:3000
Rat IgG, Alexa Fluor 568	Goat	Invitrogen	A-11077	1:3000		1:200
Rabbit IgG, Alexa Fluor 488	Goat	Invitrogen	A-11008	1:1000-3000		1:3000
Rabbit IgG, Alexa Fluor 568	Goat	Invitrogen	A-11011	1:1000
Human IgG, Alexa Fluor 568	Goat	Invitrogen	A-21090			1:3000
Human IgG, Alexa Fluor 633	Goat	Invitrogen	A-21091			1:3000
Mouse IgG, HRP	Rabbit	Invitrogen	31450				1:5000-20,000
Rabbit IgG, HRP	Goat	Invitrogen	31466				1:5000-20,000
