# Supplementary material for: SMC5/6 is required for replication fork stability and faithful chromosome segregation during neurogenesis
Source: eLife. 2020 Nov 17;9:e61171. doi: 10.7554/eLife.61171 (PMC7723410; doi:10.7554/eLife.61171)
Supplement: Supplementary file 3. [file elife-61171-supp3.xlsx]

## Sheet: Sheet1
Supplementary file 3. Statistics and p values.	Significance	p-value	Statistical test	Marker and group	Number of animals or repeats	Sections/animal
MAIN FIGURES
FIGURE 1
Figure 1E: E16.5 CASP3+ cells				Control	3	3 to 5
Control versus Smc5 cKO	****	<0.0001	Unpaired two-tailed Mann-Whitney test	Smc5 cKO	3	3 to 4
Figure 1G: E16.5 TUNEL+ cells				Control	3	3
Control versus Smc5 cKO	****	<0.0001	Unpaired two-tailed Mann-Whitney test	Smc5 cKO	3	3
Figure 1I: E16.5 Normal and abnormal anaphase cells (%)				Control	3	1 to 11 (85 cells)
Control versus Smc5 cKO	****	<0.0001	Pearson's Chi-squared test with Yates’ continuity correction	Smc5 cKO	3	1 to 8 (79 cells)
Figure 1K: P0/1 Nes-Cre Brain weight (g)				Control	8	NA
Control versus Smc5 cKO	****	<0.0001	Unpaired two-tailed Mann-Whitney test	Smc5 cKO	16	NA
Figure 1M: P56-59 Nes-Cre Brain weight (g)				Control	11	NA
Control versus Smc5 cKO	***	0.0002	Unpaired two-tailed Mann-Whitney test	Smc5 cKO	6	NA
Figure 1O: P55-56 Emx1-Cre Brain weight (g)				Control	11	NA
Control versus Smc5 cKO	****	<0.0001	Unpaired two-tailed Mann-Whitney test	Smc5 cKO	8	NA
FIGURE 2
Figure 2C: P54-57 Emx1-Cre Cortical thickness (mm)
Control versus Smc5 cKO	****	<0.0001	Unpaired two-tailed Mann-Whitney test	Control	3	4
Control versus Smc5, Trp53 dKO	ns	0.2312	Unpaired two-tailed Mann-Whitney test	Smc5 cKO	4	2 to 4
Control versus Smc5, Chek2 dKO	ns	0.133	Unpaired two-tailed Mann-Whitney test	Smc5, Trp53 dKO	4	3 to 4
Smc5 cKO versus Smc5, Trp53 dKO	****	<0.0001	Unpaired two-tailed Mann-Whitney test	Smc5, Chek2 dKO	4	4
Smc5 cKO versus Smc5, Chek2 dKO	****	<0.0001	Unpaired two-tailed Mann-Whitney test
Smc5, Trp53 dKO versus Smc5, Chek2 dKO	ns	0.9837	Unpaired two-tailed Mann-Whitney test
Figure 2D: P55-57 Emx1-Cre Brain weight (g)
Control versus Smc5 cKO	****	<0.0001	Unpaired two-tailed Mann-Whitney test	Control	13	NA
Control versus Smc5, Trp53 dKO	ns	0.3116	Unpaired two-tailed Mann-Whitney test	Smc5 cKO	12	NA
Control versus Smc5, Chek2 dKO	***	0.0008	Unpaired two-tailed Mann-Whitney test	Smc5, Trp53 dKO	6	NA
Control versus Smc5, 53bp1 dKO	***	0.0008	Unpaired two-tailed Mann-Whitney test	Smc5, Chek2 dKO	5	NA
Smc5 cKO versus Smc5, Trp53 dKO	**	0.0013	Unpaired two-tailed Mann-Whitney test	Smc5, 53bp1 dKO	4	NA
Smc5 cKO versus Smc5, Chek2 dKO	*	0.0184	Unpaired two-tailed Mann-Whitney test
Smc5 cKO versus Smc5, 53bp1 dKO	ns	0.1703	Unpaired two-tailed Mann-Whitney test
Smc5, Trp53 dKO versus Smc5, Chek2 dKO	ns	0.0801	Unpaired two-tailed Mann-Whitney test
Smc5, Trp53 dKO versus Smc5, 53bp1 dKO	**	0.0095	Unpaired two-tailed Mann-Whitney test
Smc5, Chek2 dKO versus Smc5, 53bp1 dKO	*	0.0159	Unpaired two-tailed Mann-Whitney test
Figure 2I: P0/1 Emx1-Cre TUNEL+ cells
Control versus Smc5 cKO	*	0.0286	Unpaired two-tailed Mann-Whitney test	Control	2	2
Control versus Smc5, Trp53 dKO	ns	0.3429	Unpaired two-tailed Mann-Whitney test	Smc5 cKO	2	2
Control versus Smc5, Chek2 dKO	ns	0.0857	Unpaired two-tailed Mann-Whitney test	Smc5, Trp53 dKO	2	2
Smc5 cKO versus Smc5, Trp53 dKO	*	0.0286	Unpaired two-tailed Mann-Whitney test	Smc5, Chek2 dKO	2	2
Smc5 cKO versus Smc5, Chek2 dKO	*	0.0286	Unpaired two-tailed Mann-Whitney test
Smc5, Trp53 dKO versus Smc5, Chek2 dKO	ns	0.3429	Unpaired two-tailed Mann-Whitney test
FIGURE 3
Figure 3B: SOX2+ cells in VZ
Control versus Smc5 cKO	*	0.0224	Unpaired two-tailed Mann-Whitney test	Control	3	3 to 5
Control versus Smc5, Trp53 dKO	ns	0.8299	Unpaired two-tailed Mann-Whitney test	Smc5 cKO	3	3 to 7
Control versus Smc5, Chek2 dKO	ns	0.9443	Unpaired two-tailed Mann-Whitney test	Smc5, Trp53 dKO	3	4 to 5
Smc5 cKO versus Smc5, Trp53 dKO	**	0.0043	Unpaired two-tailed Mann-Whitney test	Smc5, Chek2 dKO	3	5 to 8
Smc5 cKO versus Smc5, Chek2 dKO	*	0.0357	Unpaired two-tailed Mann-Whitney test
Smc5, Trp53 dKO versus Smc5, Chek2 dKO	ns	0.3439	Unpaired two-tailed Mann-Whitney test
Figure 3B: SOX2+ cells in Extra-VZ
Control versus Smc5 cKO	****	<0.0001	Unpaired two-tailed Mann-Whitney test	Control	3	3 to 5
Control versus Smc5, Trp53 dKO	****	<0.0001	Unpaired two-tailed Mann-Whitney test	Smc5 cKO	3	3 to 7
Control versus Smc5, Chek2 dKO	****	<0.0001	Unpaired two-tailed Mann-Whitney test	Smc5, Trp53 dKO	3	4 to 5
Smc5 cKO versus Smc5, Trp53 dKO	****	<0.0001	Unpaired two-tailed Mann-Whitney test	Smc5, Chek2 dKO	3	5 to 8
Smc5 cKO versus Smc5, Chek2 dKO	****	<0.0001	Unpaired two-tailed Mann-Whitney test
Smc5, Trp53 dKO versus Smc5, Chek2 dKO	ns	0.8081	Unpaired two-tailed Mann-Whitney test
Figure 3C: SOX2+ cells in VZ and extra-VZ (%)
Control versus Smc5 cKO	****	<2.20E-16	Pearson's Chi-squared test with Yates’ continuity correction	Control	3	3 to 5
Control versus Smc5, Trp53 dKO	****	<2.20E-16	Pearson's Chi-squared test with Yates’ continuity correction	Smc5 cKO	3	3 to 7
Control versus Smc5, Chek2 dKO	****	<2.20E-16	Pearson's Chi-squared test with Yates’ continuity correction	Smc5, Trp53 dKO	3	4 to 5
Smc5 cKO versus Smc5, Trp53 dKO	****	7.625e-08	Pearson's Chi-squared test with Yates’ continuity correction	Smc5, Chek2 dKO	3	5 to 8
Smc5 cKO versus Smc5, Chek2 dKO	****	7.035e-11	Pearson's Chi-squared test with Yates’ continuity correction
Smc5, Trp53 dKO versus Smc5, Chek2 dKO	ns	0.3511	Pearson's Chi-squared test with Yates’ continuity correction
Figure 3E: PAX6+ cells in VZ
Control versus Smc5 cKO	ns	0.7765	Unpaired two-tailed Mann-Whitney test	Control	3	3 to 6
Control versus Smc5, Trp53 dKO	***	0.0001	Unpaired two-tailed Mann-Whitney test	Smc5 cKO	3	2 to 4
Control versus Smc5, Chek2 dKO	**	0.0051	Unpaired two-tailed Mann-Whitney test	Smc5, Trp53 dKO	3	2 to 5
Smc5 cKO versus Smc5, Trp53 dKO	***	0.0002	Unpaired two-tailed Mann-Whitney test	Smc5, Chek2 dKO	3	3 to 4
Smc5 cKO versus Smc5, Chek2 dKO	*	0.019	Unpaired two-tailed Mann-Whitney test
Smc5, Trp53 dKO versus Smc5, Chek2 dKO	*	0.0254	Unpaired two-tailed Mann-Whitney test
Figure 3E: PAX6+ cells in Extra-VZ
Control versus Smc5 cKO	***	0.0008	Unpaired two-tailed Mann-Whitney test	Control	3	3 to 6
Control versus Smc5, Trp53 dKO	****	<0.0001	Unpaired two-tailed Mann-Whitney test	Smc5 cKO	3	2 to 4
Control versus Smc5, Chek2 dKO	****	<0.0001	Unpaired two-tailed Mann-Whitney test	Smc5, Trp53 dKO	3	2 to 5
Smc5 cKO versus Smc5, Trp53 dKO	ns	0.064	Unpaired two-tailed Mann-Whitney test	Smc5, Chek2 dKO	3	3 to 4
Smc5 cKO versus Smc5, Chek2 dKO	ns	0.212	Unpaired two-tailed Mann-Whitney test
Smc5, Trp53 dKO versus Smc5, Chek2 dKO	ns	0.834	Unpaired two-tailed Mann-Whitney test
Figrure 3F: PAX6+ cells in VZ and extra-VZ (%)
Control versus Smc5 cKO	****	3.173e-10	Pearson's Chi-squared test with Yates’ continuity correction	Control	3	3 to 6
Control versus Smc5, Trp53 dKO	****	1.025e-11	Pearson's Chi-squared test with Yates’ continuity correction	Smc5 cKO	3	2 to 4
Control versus Smc5, Chek2 dKO	****	8.114e-14	Pearson's Chi-squared test with Yates’ continuity correction	Smc5, Trp53 dKO	3	2 to 5
Smc5 cKO versus Smc5, Trp53 dKO	ns	0.8288	Pearson's Chi-squared test with Yates’ continuity correction	Smc5, Chek2 dKO	3	3 to 4
Smc5 cKO versus Smc5, Chek2 dKO	ns	0.7123	Pearson's Chi-squared test with Yates’ continuity correction
Smc5, Trp53 dKO versus Smc5, Chek2 dKO	ns	0.4526	Pearson's Chi-squared test with Yates’ continuity correction
Figure 3H: TBR2+ cells
Control versus Smc5 cKO	****	<0.0001	Unpaired two-tailed Mann-Whitney test	Control	3	3 to 10
Control versus Smc5, Trp53 dKO	*	0.018	Unpaired two-tailed Mann-Whitney test	Smc5 cKO	3	4 to 6
Control versus Smc5, Chek2 dKO	**	0.0029	Unpaired two-tailed Mann-Whitney test	Smc5, Trp53 dKO	3	2 to 4
Smc5 cKO versus Smc5, Trp53 dKO	****	<0.0001	Unpaired two-tailed Mann-Whitney test	Smc5, Chek2 dKO	3	2 to 3
Smc5 cKO versus Smc5, Chek2 dKO	****	<0.0001	Unpaired two-tailed Mann-Whitney test
Smc5, Trp53 dKO versus Smc5, Chek2 dKO	ns	0.948	Unpaired two-tailed Mann-Whitney test
Figure 3I: TBR2/cortex thickness ratio
Control versus Smc5 cKO	****	<0.0001	Unpaired two-tailed Mann-Whitney test	Control	3	3 to 10
Control versus Smc5, Trp53 dKO	ns	0.3338	Unpaired two-tailed Mann-Whitney test	Smc5 cKO	3	4 to 6
Control versus Smc5, Chek2 dKO	ns	0.0858	Unpaired two-tailed Mann-Whitney test	Smc5, Trp53 dKO	3	2 to 4
Smc5 cKO versus Smc5, Trp53 dKO	****	<0.0001	Unpaired two-tailed Mann-Whitney test	Smc5, Chek2 dKO	3	2 to 3
Smc5 cKO versus Smc5, Chek2 dKO	****	<0.0001	Unpaired two-tailed Mann-Whitney test
Smc5, Trp53 dKO versus Smc5, Chek2 dKO	*	0.0205	Unpaired two-tailed Mann-Whitney test
Figure 3K: TBR1+ cells
Control versus Smc5 cKO	****	<0.0001	Unpaired two-tailed Mann-Whitney test	Control	3	4 to 8
Control versus Smc5, Trp53 dKO	**	0.0064	Unpaired two-tailed Mann-Whitney test	Smc5 cKO	3	3 to 5
Control versus Smc5, Chek2 dKO	ns	0.7663	Unpaired two-tailed Mann-Whitney test	Smc5, Trp53 dKO	3	4 to 6
Smc5 cKO versus Smc5, Trp53 dKO	****	<0.0001	Unpaired two-tailed Mann-Whitney test	Smc5, Chek2 dKO	3	4 to 6
Smc5 cKO versus Smc5, Chek2 dKO	****	<0.0001	Unpaired two-tailed Mann-Whitney test
Smc5, Trp53 dKO versus Smc5, Chek2 dKO	**	0.0023	Unpaired two-tailed Mann-Whitney test
Figure 3L: TBR1/cortex thickness ratio
Control versus Smc5 cKO	****	<0.0001	Unpaired two-tailed Mann-Whitney test	Control	3	4 to 8
Control versus Smc5, Trp53 dKO	ns	0.1675	Unpaired two-tailed Mann-Whitney test	Smc5 cKO	3	3 to 5
Control versus Smc5, Chek2 dKO	ns	0.7306	Unpaired two-tailed Mann-Whitney test	Smc5, Trp53 dKO	3	4 to 6
Smc5 cKO versus Smc5, Trp53 dKO	****	<0.0001	Unpaired two-tailed Mann-Whitney test	Smc5, Chek2 dKO	3	4 to 6
Smc5 cKO versus Smc5, Chek2 dKO	****	<0.0001	Unpaired two-tailed Mann-Whitney test
Smc5, Trp53 dKO versus Smc5, Chek2 dKO	*	0.0197	Unpaired two-tailed Mann-Whitney test
Figure 3N: CTIP2+ cells
Control versus Smc5 cKO	*	0.0235	Unpaired two-tailed Mann-Whitney test	Control	3	4 to 6
Control versus Smc5, Trp53 dKO	ns	0.1583	Unpaired two-tailed Mann-Whitney test	Smc5 cKO	3	2 to 6
Control versus Smc5, Chek2 dKO	ns	0.3213	Unpaired two-tailed Mann-Whitney test	Smc5, Trp53 dKO	3	3 to 4
Smc5 cKO versus Smc5, Trp53 dKO	**	0.0014	Unpaired two-tailed Mann-Whitney test	Smc5, Chek2 dKO	3	2 to 3
Smc5 cKO versus Smc5, Chek2 dKO	ns	0.4787	Unpaired two-tailed Mann-Whitney test
Smc5, Trp53 dKO versus Smc5, Chek2 dKO	ns	0.0713	Unpaired two-tailed Mann-Whitney test
Figure 3O: SATB2+ cells
Control versus Smc5 cKO	**	0.0087	Unpaired two-tailed Mann-Whitney test	Control	3	4 to 6
Control versus Smc5, Trp53 dKO	**	0.0029	Unpaired two-tailed Mann-Whitney test	Smc5 cKO	3	2 to 6
Control versus Smc5, Chek2 dKO	ns	0.2892	Unpaired two-tailed Mann-Whitney test	Smc5, Trp53 dKO	3	3 to 4
Smc5 cKO versus Smc5, Trp53 dKO	***	0.0003	Unpaired two-tailed Mann-Whitney test	Smc5, Chek2 dKO	3	2 to 3
Smc5 cKO versus Smc5, Chek2 dKO	ns	0.0868	Unpaired two-tailed Mann-Whitney test
Smc5, Trp53 dKO versus Smc5, Chek2 dKO	**	0.0029	Unpaired two-tailed Mann-Whitney test
FIGURE 4	Significance	p-value
Figure 4B: E16.5 Emx1-Cre Ki67+ cells
Control versus Smc5 cKO	*	0.0443	Unpaired two-tailed Mann-Whitney test	Control	3	5 to 6
				Smc5 cKO	3	3 to 5
Figure 4C: E16.5 Emx1-Cre H3P+ cells
Control versus Smc5 cKO	****	<0.0001	Unpaired two-tailed Mann-Whitney test	Control	3	5 to 6
				Smc5 cKO	3	3 to 5
Figure 4D: E16.5 Emx1-Cre H3P+Ki67+ to Ki67+ cell ratio
Control versus Smc5 cKO	*	0.013	Unpaired two-tailed Mann-Whitney test	Control	3	5 to 6
				Smc5 cKO	3	3 to 5
Figure 4F: E16.5 Emx1-Cre CldU+ cells
Control versus Smc5 cKO	*	0.0286	Unpaired two-tailed Mann-Whitney test	Control	2	2
				Smc5 cKO	2	2
Figure 4G: E16.5 Emx1-Cre CldU+H3P+ to CldU+ cell ratio
Control versus Smc5 cKO	ns	0.8286	Unpaired two-tailed Mann-Whitney test	Control	2	2
				Smc5 cKO	2	2
Figure 4J: E16.5 Nes-Cre FANCD2 number of foci						Total cells
Control versus Smc5 cKO	****	<0.0001	Unpaired two-tailed Mann-Whitney test	Control	2	21
				Smc5 cKO	2	27
Figure 4K: E16.5 Nes-Cre FANCD2+CEN number of foci						Total cells
Control versus Smc5 cKO	****	<0.0001	Unpaired two-tailed Mann-Whitney test	Control	2	20
				Smc5 cKO	2	27
Figure 4M: E16.5 Nes-Cre average H4K20 width (µm)						Total cells
Control versus Smc5 cKO	****	<0.0001	Unpaired two-tailed Mann-Whitney test	Control	2	32
				Smc5 cKO	2	43
Figure 4N: E16.5 Nes-Cre H4K20 average Intensity						Total cells
Control versus Smc5 cKO	****	<0.0001	Unpaired two-tailed Mann-Whitney test	Control	2	32
				Smc5 cKO	2	43
FIGURE 5
Figure 5E: mESC proliferation				Repeats	3	NA
CHEK2i versus untreated	*	0.0289	Unpaired two-tailed t test
IAA versus untreated	**	0.0019	Unpaired two-tailed t test
CHEK2i+IAA versus untreated	ns	0.059	Unpaired two-tailed t test
IAA versus CHEK2i	**	0.0042	Unpaired two-tailed t test
CHEK2i+IAA versus CHEK2i	ns	0.9232	Unpaired two-tailed t test
CHEK2i+IAA versus IAA	**	0.0086	Unpaired two-tailed t test
Figure 5G: DNA fiber analysis				Repeats		Total fibers
CHEK2i versus CHEK2i+IAA, new origins	ns	0.096	Pearson’s Chi-squared test with Yates’ continuity correction	CHEK2i	3	354
CHEK2i versus CHEK2i+IAA, stalled	**	0.0025	Pearson’s Chi-squared test with Yates’ continuity correction	CHEK2i+IAA	3	429
CHEK2i versus CHEK2i+IAA, converging	*	0.0436	Pearson’s Chi-squared test with Yates’ continuity correction
CHEK2i versus CHEK2i+IAA, ongoing	****	<0.0001	Pearson’s Chi-squared test with Yates’ continuity correction
Figure 5H: DNA fiber analysis
Control versus IAA, new origins	ns	0.724	Pearson's Chi-squared test with Yates’ continuity correction	Control	3	334
Control versus IAA, stalled	****	<0.0001	Pearson's Chi-squared test with Yates’ continuity correction	IAA	3	558
Control versus IAA, converging	ns	0.08	Pearson's Chi-squared test with Yates’ continuity correction
Control versus IAA, ongoing	****	<0.0001	Pearson's Chi-squared test with Yates’ continuity correction
Figure 5I: Track length				Repeats		Total fibers
CHEK2i versus CHEK2i+IAA	****	<0.0001	Unpaired two-tailed Mann-Whitney test	CHEK2i	3	142
				CHEK2i+IAA	3	107
Figure 5J: Fork symmetry				Repeats
CHEK2i versus CHEK2i+IAA	****	<0.0001	Unpaired two-tailed Mann-Whitney test	CHEK2i	3	142
				CHEK2i+IAA	3	107
FIGURE 6
Figure 6C: EdU				Repeats		Total cells
Control versus IAA	****	<0.0001	Unpaired two-tailed Mann-Whitney test	Control	2	34
				IAA	2	37
Figure 6D: EdU+FANCD2+				Repeats
Control versus IAA	****	<0.0001	Unpaired two-tailed Mann-Whitney test	Control	2	34
				IAA	2	37
Figure 6E: EdU+CEN+				Repeats
Control versus IAA	****	<0.0001	Unpaired two-tailed Mann-Whitney test	Control	2	34
				IAA	2	37
Figure 6F: EdU+CEN+FANCD2+				Repeats
Control versus IAA	****	<0.0001	Unpaired two-tailed Mann-Whitney test	Control	2	34
				IAA	2	37
SUPPLEMENTARY FIGURES
FIGURE. S1	Significance	p-value
Figure S1D: E13.5 CASP3+ cells				Control	2	4 to 8
Control versus Smc5 cKO	****	<0.0001	Unpaired two-tailed Mann-Whitney test	Smc5 cKO	2	5 to 6
Figure S1F: E13.5 TUNEL+ cells				Control	3	3 to 8
Control versus Smc5 cKO	ns	0.054	Unpaired two-tailed Mann-Whitney test	Smc5 cKO	2	3 to 4
Figure S1H: E13.5 Normal and abnormal anaphase cells (%)				Control	2	5 to 9 (191 cells)
Control versus Smc5 cKO	**	0.002	Pearson's Chi-squared test with Yates’ continuity correction	Smc5 cKO	2	4 to 7 (126 cells)
Figure S1J: E16.5 Cleavage plane orientation				Control	3	1 to 11 (85 cells)
Control versus Smc5 cKO	*	0.0124	Pearson's Chi-squared test with Yates’ continuity correction	Smc5 cKO	4	1 to 8 (82 cells)
FIGURE S2	Significance	p-value
Figure S2B: P0/1 Nes-Cre Cortical area (cm2)				Control	4	NA
Control versus Smc5 cKO	*	0.0286	Unpaired two-tailed Mann-Whitney test	Smc5 cKO	4	NA
Figure S2F: P0/1 Emx1-Cre Cortical area (cm2)				Control	14	NA
Control versus Smc5 cKO	****	<0.0001	Unpaired two-tailed Mann-Whitney test	Smc5 cKO	6	NA
Figure S2G: P0/1 Emx1-Cre Brain weight (g)				Control	23	NA
Control versus Smc5 cKO	*	0.0188	Unpaired two-tailed Mann-Whitney test	Smc5 cKO	15	NA
Figure S2I: P55-56 Emx1-Cre Cortical area (cm2)				Control	5	NA
Control versus Smc5 cKO	**	0.0025	Unpaired two-tailed Mann-Whitney test	Smc5 cKO	7	NA
Figure S2K: P278-344 Emx1-Cre Cortical area (cm2)				Control	12	NA
Control versus Smc5 cKO	****	<0.0001	Unpaired two-tailed Mann-Whitney test	Smc5 cKO	11	NA
Figure S2L: P278-344 Emx1-Cre Brain weight (g)				Control	12	NA
Control versus Smc5 cKO	****	<0.0001	Unpaired two-tailed Mann-Whitney test	Smc5 cKO	11	NA
FIGURE S3
Figure S3A: P293 Nes-Cre Adhesive patch test (males)	***	0.0002	Unpaired two-tailed Mann-Whitney test	Control	2	NA
Control versus Smc5 cKO				Smc5 cKO	2	NA
Figure S3B: P295 Nes-Cre Inverted screen test (females)	***	0.0004	Unpaired two-tailed Mann-Whitney test	Control	2	NA
Control versus Smc5 cKO				Smc5 cKO	2	NA
Figure S3C: P293/295 Nes-Cre Cylinder test (no paws)	***	0.0002	Unpaired two-tailed Mann-Whitney test	Control	4	NA
Control versus Smc5 cKO				Smc5 cKO	4	NA
Figure S3D: P293/295 Nes-Cre Cylinder test (two paws)	***	0.0003	Unpaired two-tailed Mann-Whitney test	Control	4	NA
Control versus Smc5 cKO				Smc5 cKO	4	NA
Figure S3G: P293/295 Nes-Cre Cortical thickness (mm)	**	0.0037	Unpaired two-tailed Mann-Whitney test	Control	2	4
Control versus Smc5 cKO				Smc5 cKO	2	4
Figure S3H: P293/295 Nes-Cre Brain weight (g)	*	0.0286	Unpaired two-tailed Mann-Whitney test	Control	4	NA
Control versus Smc5 cKO				Smc5 cKO	4	NA
FIGURE S4	Significance	p-value
Figure S4A: RAD51 relative intensity (AU)
Control versus Smc5 cKO	**	0.0078	Unpaired two-tailed Mann-Whitney test	Repeats	2	NA
Figure S4C: P55-57 Emx1-Cre Brain weight (g)
Control versus Trp53 KO	ns	0.6905	Unpaired two-tailed Mann-Whitney test	Control	5	NA
Control versus Chek2 KO	ns	0.7302	Unpaired two-tailed Mann-Whitney test	Trp53 KO	5	NA
Trp53 KO versus Chek2 KO	ns	0.1508	Unpaired two-tailed Mann-Whitney test	Chek2 KO	5	NA
Figure S4D: P55-57 Emx1-Cre Cortical area (cm2)
Control versus Smc5 cKO	****	<0.0001	Unpaired two-tailed Mann-Whitney test	Control	13	NA
Control versus Smc5, Trp53 dKO	ns	0.1274	Unpaired two-tailed Mann-Whitney test	Smc5 cKO	12	NA
Control versus Smc5, Chek2 dKO	***	0.0002	Unpaired two-tailed Mann-Whitney test	Smc5, Trp53 dKO	6	NA
Control versus Smc5, 53bp1 dKO	***	0.0008	Unpaired two-tailed Mann-Whitney test	Smc5, Chek2 dKO	5	NA
Smc5 cKO versus Smc5, Trp53 dKO	***	0.0001	Unpaired two-tailed Mann-Whitney test	Smc5, 53bp1 dKO	4	NA
Smc5 cKO versus Smc5, Chek2 dKO	**	0.0039	Unpaired two-tailed Mann-Whitney test
Smc5 cKO versus Smc5, 53bp1 dKO	ns	0.7703	Unpaired two-tailed Mann-Whitney test
Smc5, Trp53 dKO versus Smc5, Chek2 dKO	**	0.0043	Unpaired two-tailed Mann-Whitney test
Smc5, Trp53 dKO versus Smc5, 53bp1 dKO	**	0.0095	Unpaired two-tailed Mann-Whitney test
Smc5, Chek2 dKO versus Smc5, 53bp1 dKO	*	0.0317	Unpaired two-tailed Mann-Whitney test
Figure S4F: P0/1 Emx1-Cre Cortical thickness (mm)
Control versus Smc5 cKO	****	<0.0001	Unpaired two-tailed Mann-Whitney test	Control	4	4 to 7
Control versus Smc5, Trp53 dKO	ns	0.4014	Unpaired two-tailed Mann-Whitney test	Smc5 cKO	4	5 to 7
Control versus Smc5, Chek2 dKO	ns	0.168	Unpaired two-tailed Mann-Whitney test	Smc5, Trp53 dKO	4	5 to 6
Smc5 cKO versus Smc5, Trp53 dKO	****	<0.0001	Unpaired two-tailed Mann-Whitney test	Smc5, Chek2 dKO	4	2 to 6
Smc5 cKO versus Smc5, Chek2 dKO	***	0.0005	Unpaired two-tailed Mann-Whitney test
Smc5, Trp53 dKO versus Smc5, Chek2 dKO	**	0.0051	Unpaired two-tailed Mann-Whitney test
FIGURE S6
Figure S6C: E16.5 Emx1-Cre H3P+ cells				Control	3	4 to 6
Control versus Smc5 cKO	****	<0.0001	Unpaired two-tailed Mann-Whitney test	Smc5 cKO	3	3 to 4
Figure S6F: E16.5 Emx1-Cre CldU+H3P+ cells				Control	2	2
Control versus Smc5 cKO	*	0.0286	Unpaired two-tailed Mann-Whitney test	Smc5 cKO	2	2
FIGURE S7
Figure S7E: P-p53+ distribution during cell cycle phases					Repeats	Total cells
Control versus IAA, p-p53+ (G1)	****	<0.0001	Pearson's Chi-squared test with Yates’ continuity correction	Control	3	1452
Control versus IAA, p-p53+ (S/G2)	****	<0.0001	Pearson's Chi-squared test with Yates’ continuity correction	IAA	3	913
Control versus IAA, p-p53+ (prophase)	****	<0.0001	Pearson's Chi-squared test with Yates’ continuity correction
Control versus IAA, p-p53+ (other mitotic)	ns	NA	Pearson's Chi-squared test with Yates’ continuity correction
Control versus IAA, G1	****	<0.0001	Pearson's Chi-squared test with Yates’ continuity correction
Control versus IAA, S/G2	****	<0.0001	Pearson's Chi-squared test with Yates’ continuity correction
Control versus IAA, prophase	***	0.0001	Pearson's Chi-squared test with Yates’ continuity correction
Control versus IAA, other mitotic	ns	0.3032	Pearson's Chi-squared test with Yates’ continuity correction
Figure S7F: Total P-p53+ distribution during cell cycle					Repeats	Total cells
Control versus IAA, G1	****	<0.0001	Pearson's Chi-squared test with Yates’ continuity correction	Control	3	473
Control versus IAA, S/G2	****	<0.0001	Pearson's Chi-squared test with Yates’ continuity correction	IAA	3	96
Control versus IAA, prophase	*	0.0143	Pearson's Chi-squared test with Yates’ continuity correction
Figure S7G: DNA fiber analysis
p53i versus p53i+IAA, new origins	ns	0.3085	Pearson's Chi-squared test with Yates’ continuity correction		Repeats	Total fibers
p53i versus p53i+IAA, stalled	ns	1	Pearson's Chi-squared test with Yates’ continuity correction	p53i	2	173
p53i versus p53i+IAA, converging	*	0.0471	Pearson's Chi-squared test with Yates’ continuity correction	p53i+IAA	2	114
p53i versus p53i+IAA, ongoing	*	0.0112	Pearson's Chi-squared test with Yates’ continuity correction
Figure S7H: DNA fiber analysis
Control versus IAA, track length	*	0.0134	Unpaired two-tailed Mann-Whitney test	Control	3	80
				IAA	3	127
Figure S7I: DNA fiber analysis
Control versus IAA, CldU/IdU ratio	****	<0.0001	Unpaired two-tailed Mann-Whitney test	Control	3	63
				IAA	3	64
FIGURE S8
Figure S8A: EdU+FANCD2- (%)						Total cells
Control versus IAA	ns	0.3618	Unpaired two-tailed Mann-Whitney test	Control	2	29
				IAA	2	33
Figure S8B: EdU-FANCD2+ (%)
Control versus IAA	***	0.0002	Unpaired two-tailed Mann-Whitney test	Control	2	32
				IAA	2	33
Figure S8C: Acro./non-acro. EdU ratio
Control versus IAA	ns	0.1673	Unpaired two-tailed Mann-Whitney test	Control	2	19
				IAA	2	31
