# Supplementary figures and images for: SMC5/6 is required for replication fork stability and faithful chromosome segregation during neurogenesis
Source: eLife journal article supplement (doi:10.7554/elife.61171), 2020-11-17

**Figure 1-figure supplement 1**

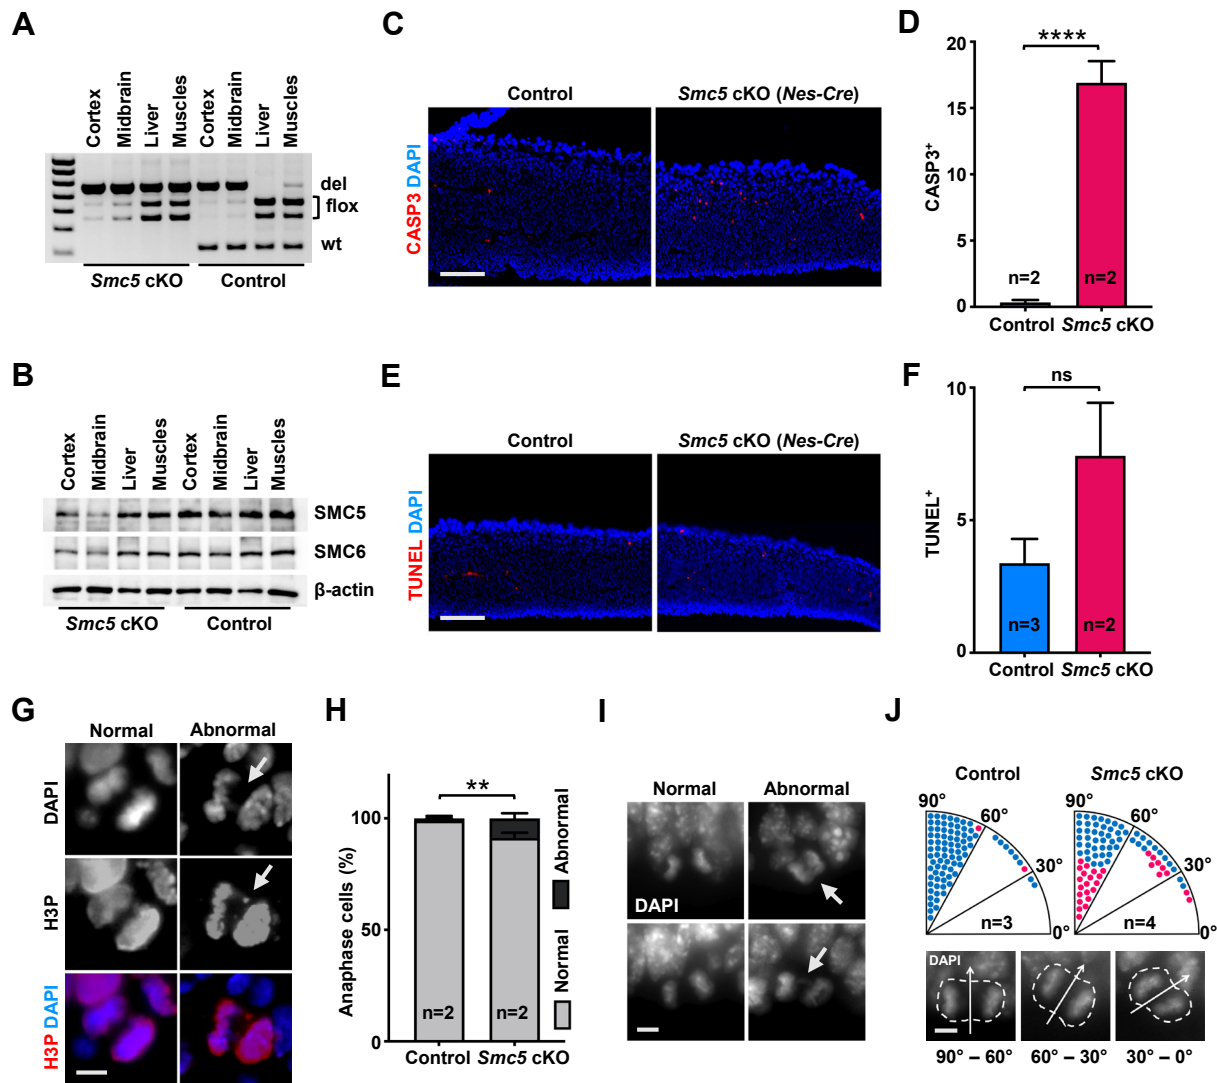

Supplement: supp [file elife_poa_e61171_Figure_1_figure_supplement_1.pdf › elife_poa_e61171_Figure_1_figure_supplement_1.pdf]

**Figure 1-figure supplement 2**

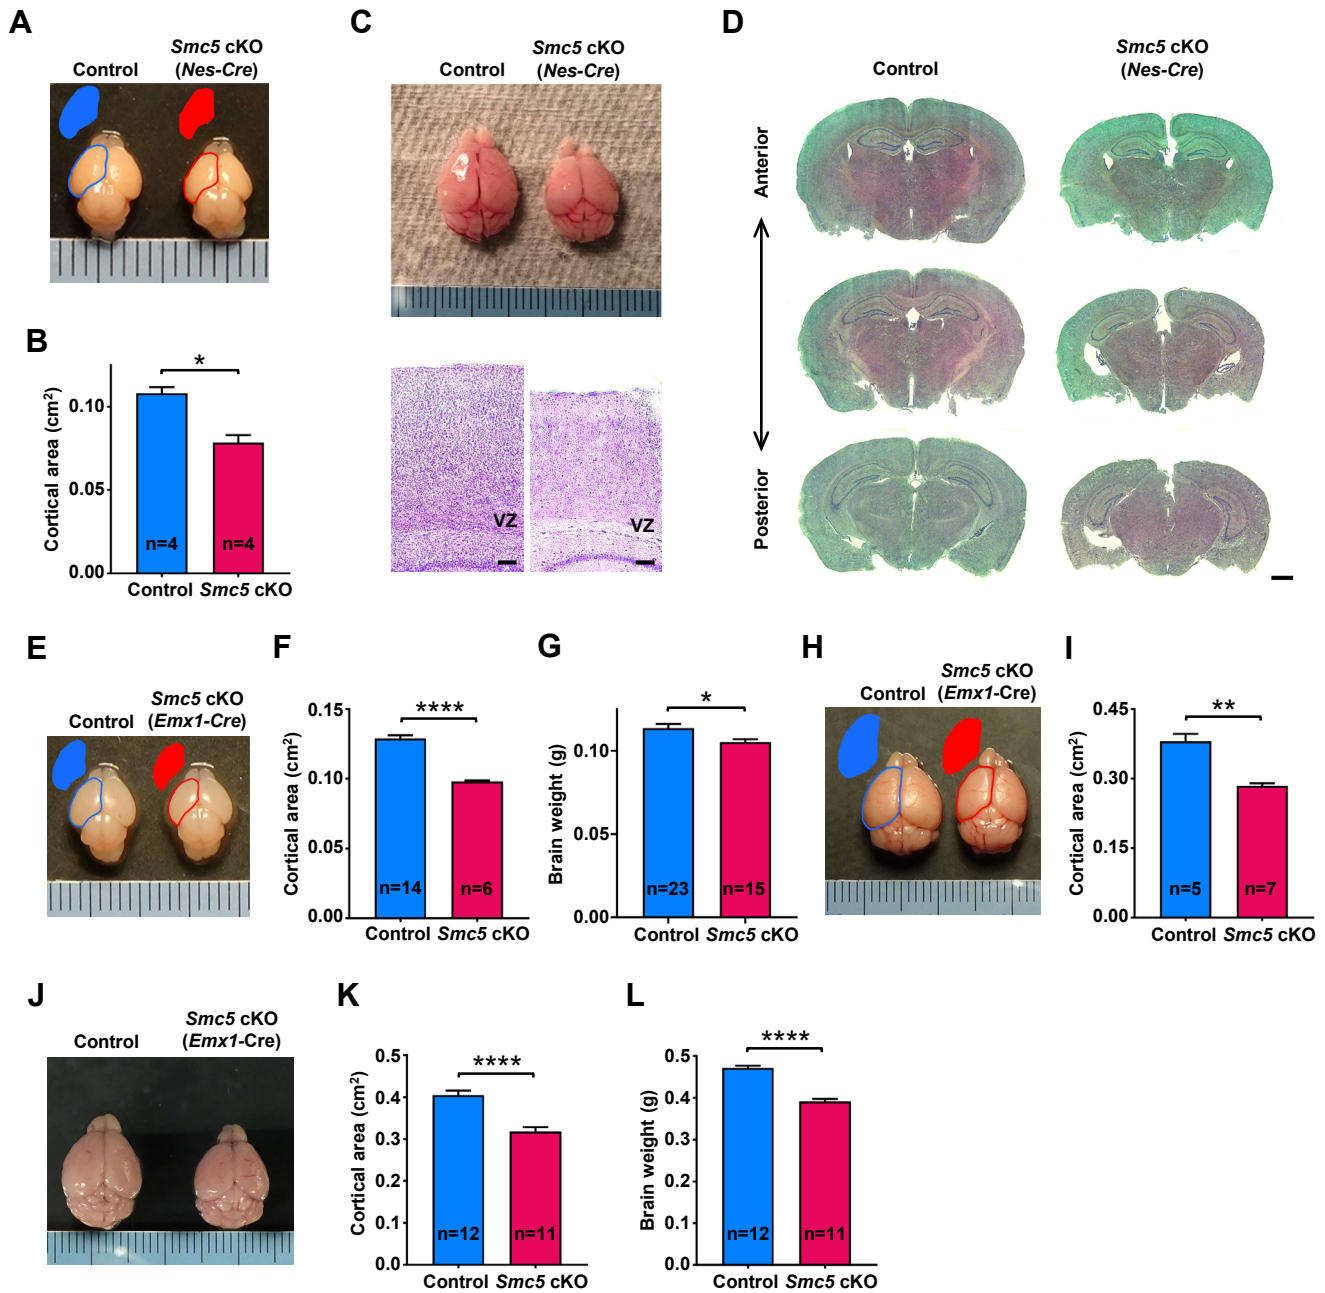

Supplement: supp [file elife_poa_e61171_Figure_1_figure_supplement_2.pdf › elife_poa_e61171_Figure_1_figure_supplement_2.pdf]

**Figure 1-figure supplement 3**

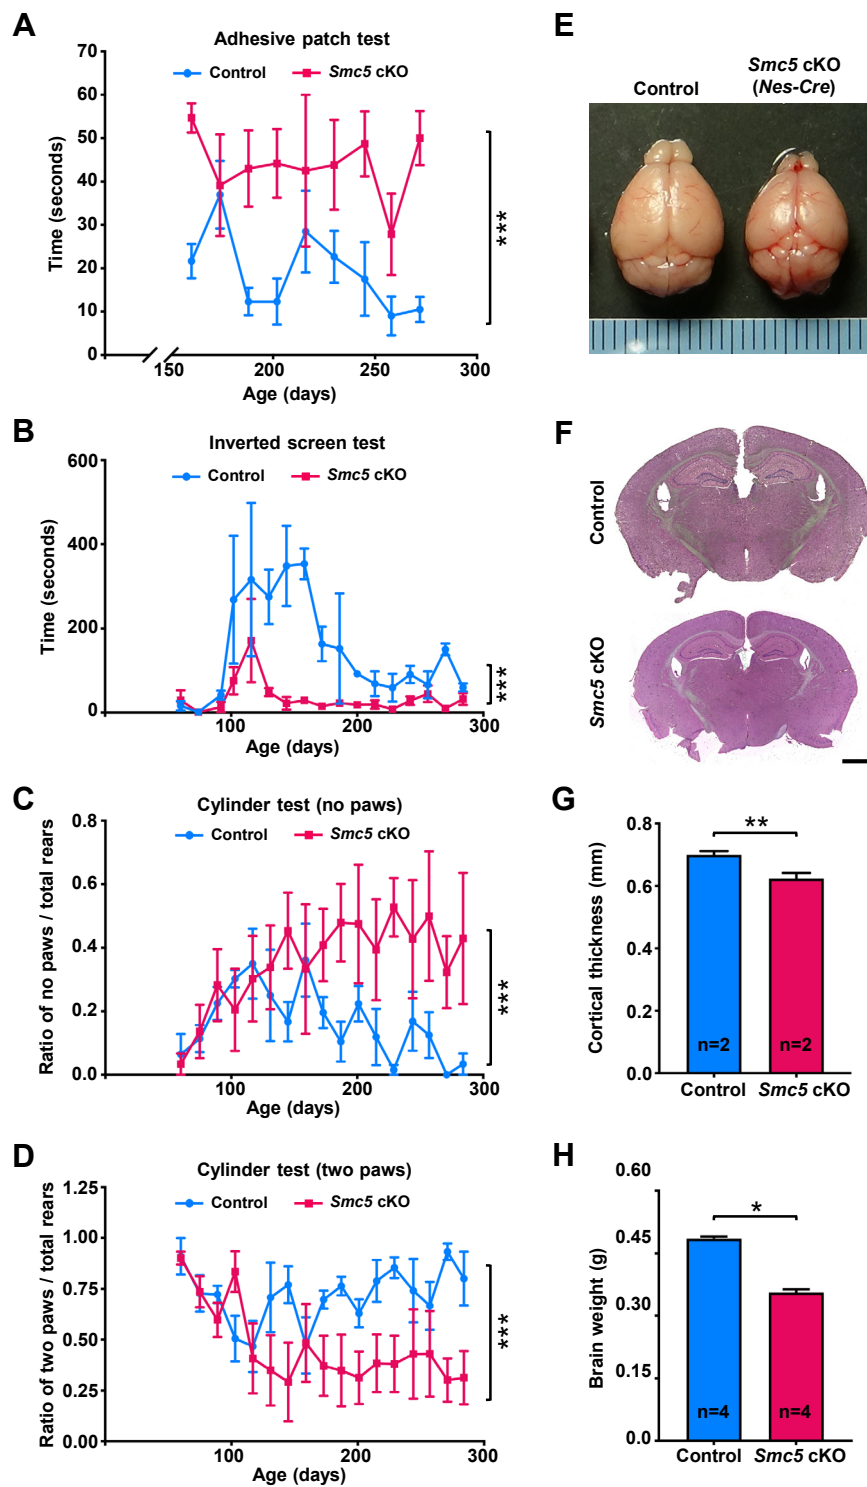

Supplement: supp [file elife_poa_e61171_Figure_1_figure_supplement_3.pdf › elife_poa_e61171_Figure_1_figure_supplement_3.pdf]

**Figure 2-figure supplement 1**

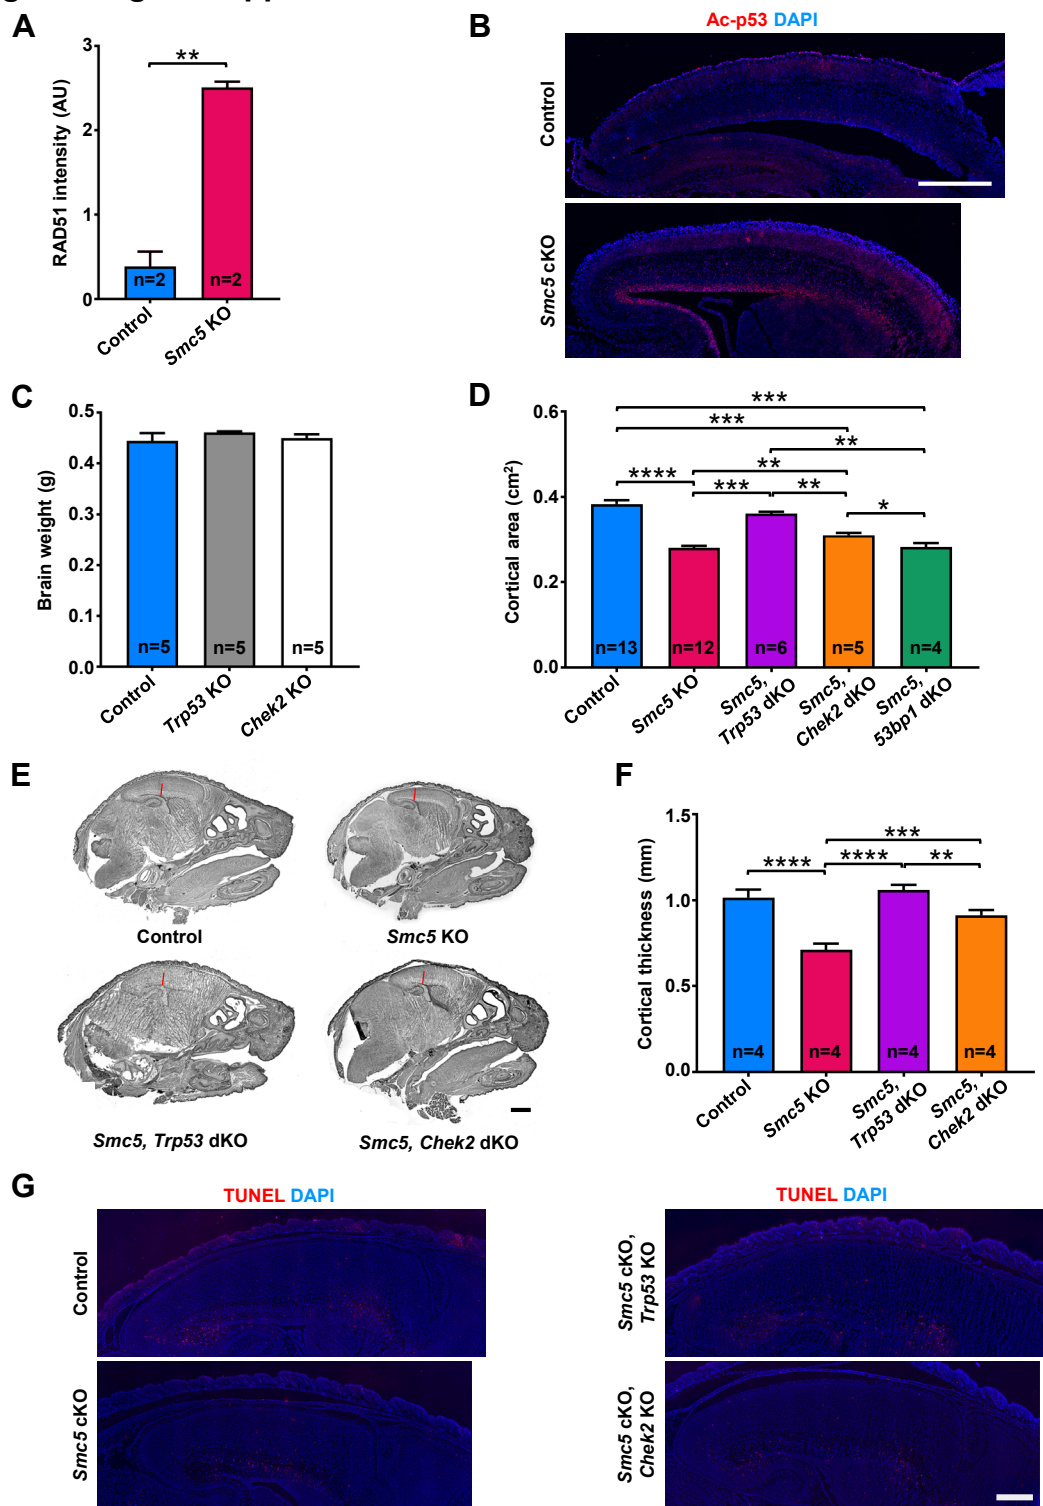

Supplement: supp [file elife_poa_e61171_Figure_2_figure_supplement_1.pdf › elife_poa_e61171_Figure_2_figure_supplement_1.pdf]

Figure 3-figure supplement 1

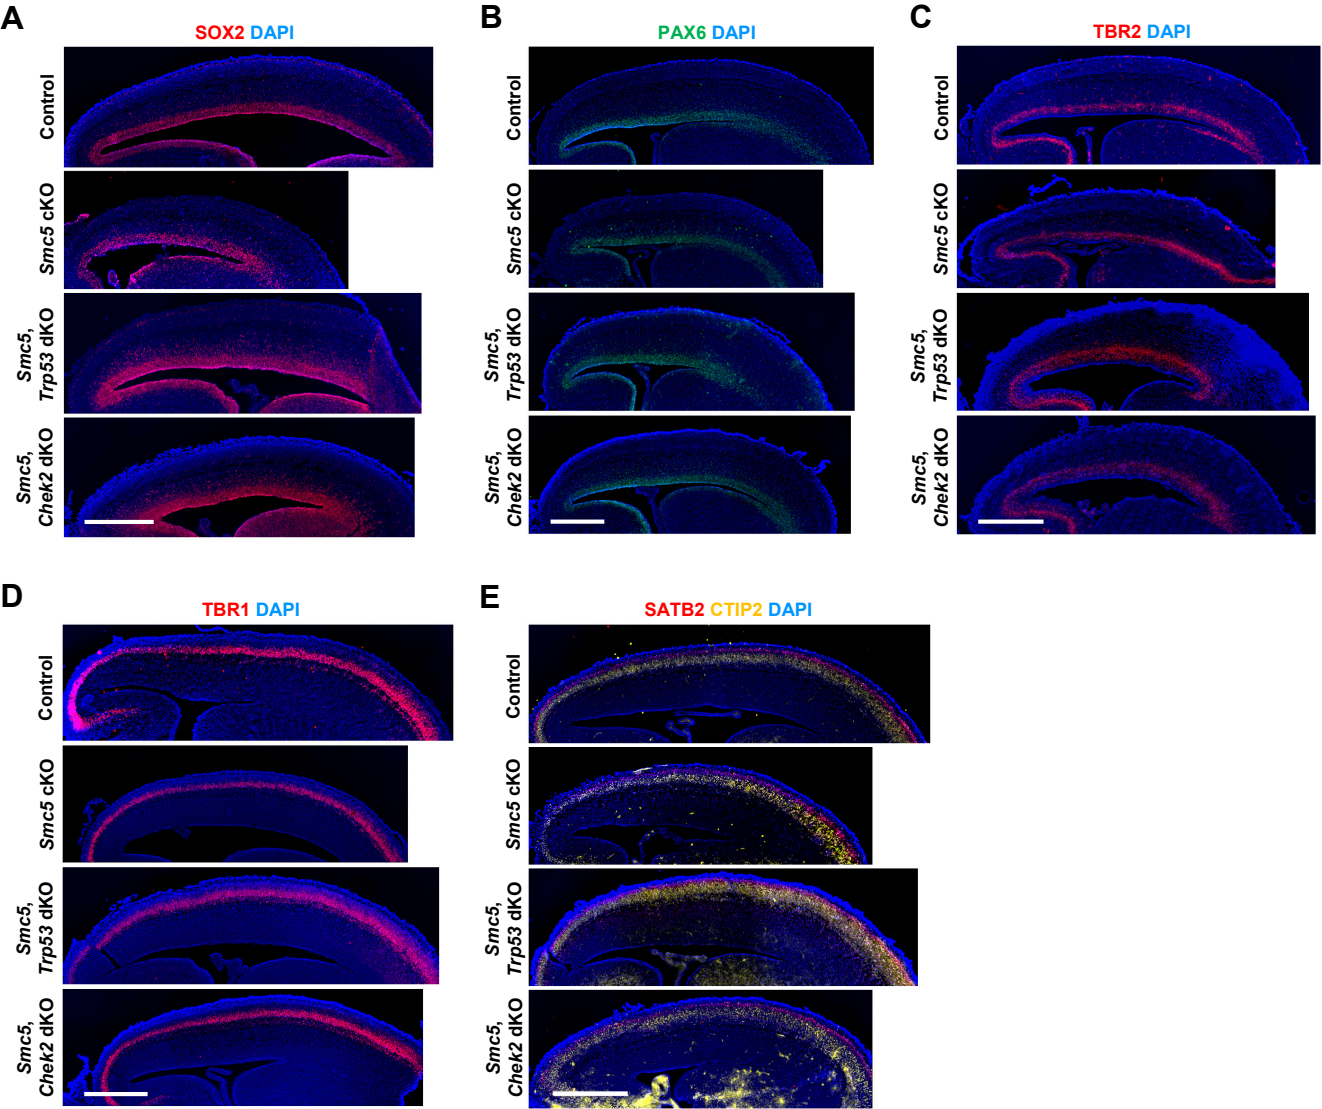

Supplement: supp [file elife_poa_e61171_Figure_3_figure_supplement_1.pdf › elife_poa_e61171_Figure_3_figure_supplement_1.pdf]

**Figure 4-figure supplement 1**

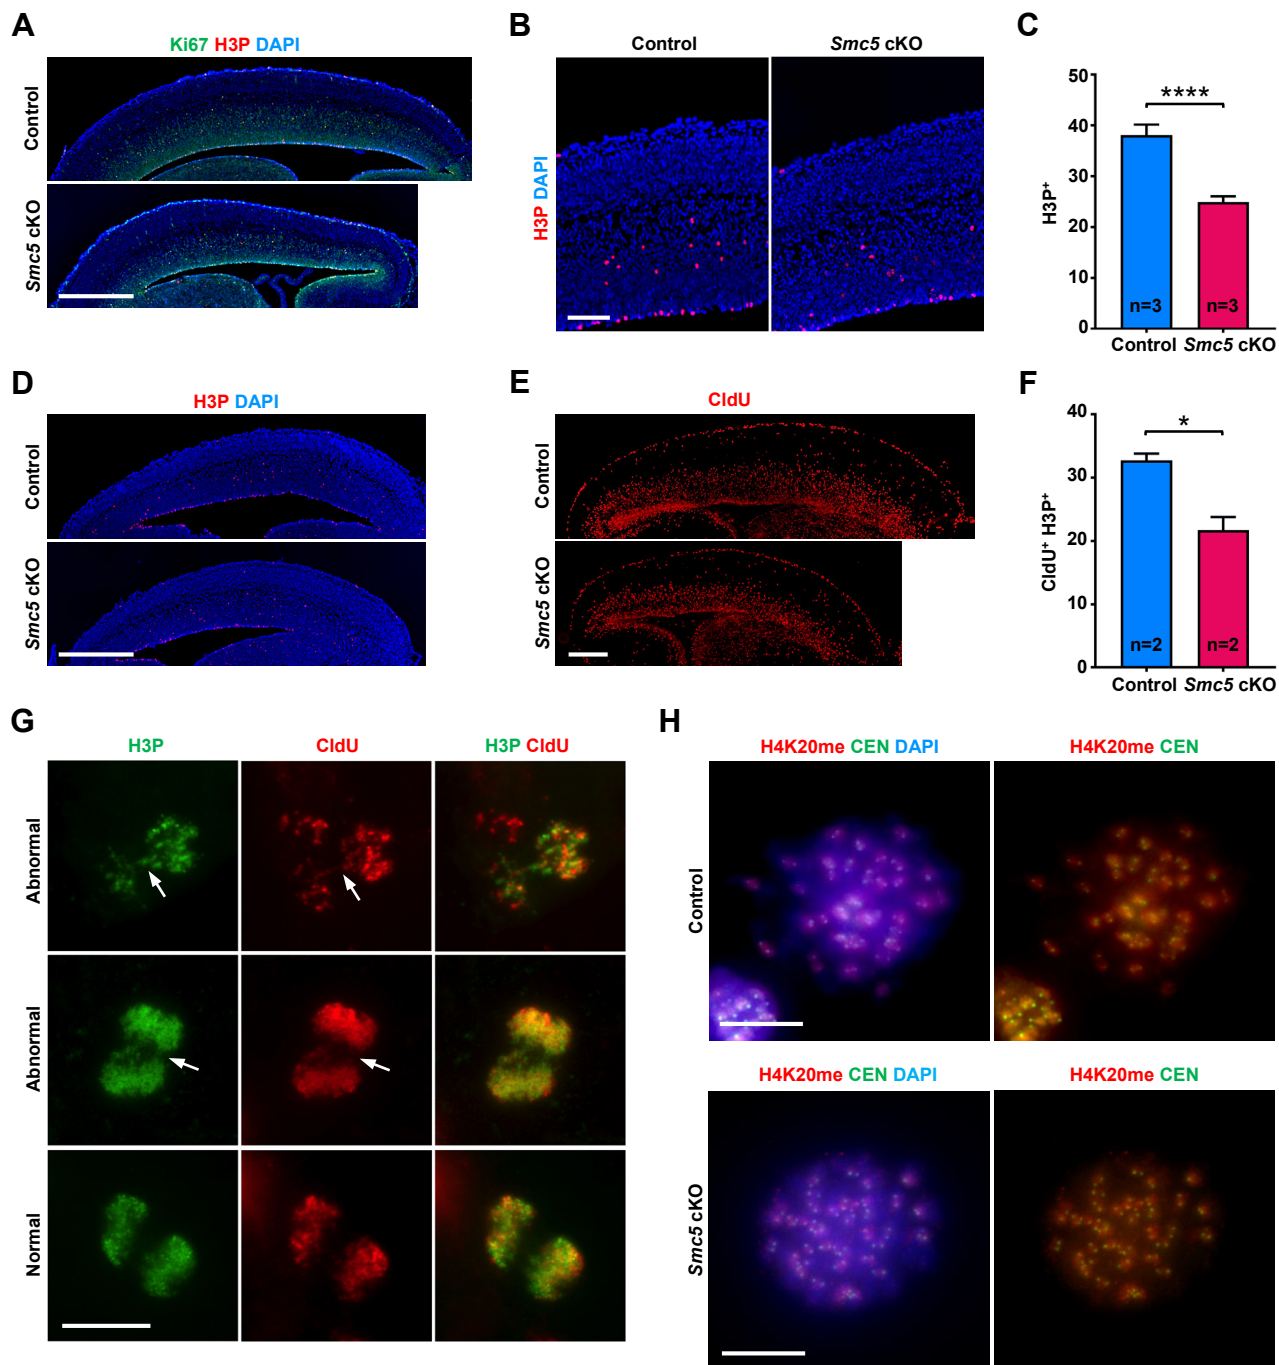

Supplement: supp [file elife_poa_e61171_Figure_4_figure_supplement_1.pdf › elife_poa_e61171_Figure_4_figure_supplement_1.pdf]

**Figure 5-figure supplement 1**

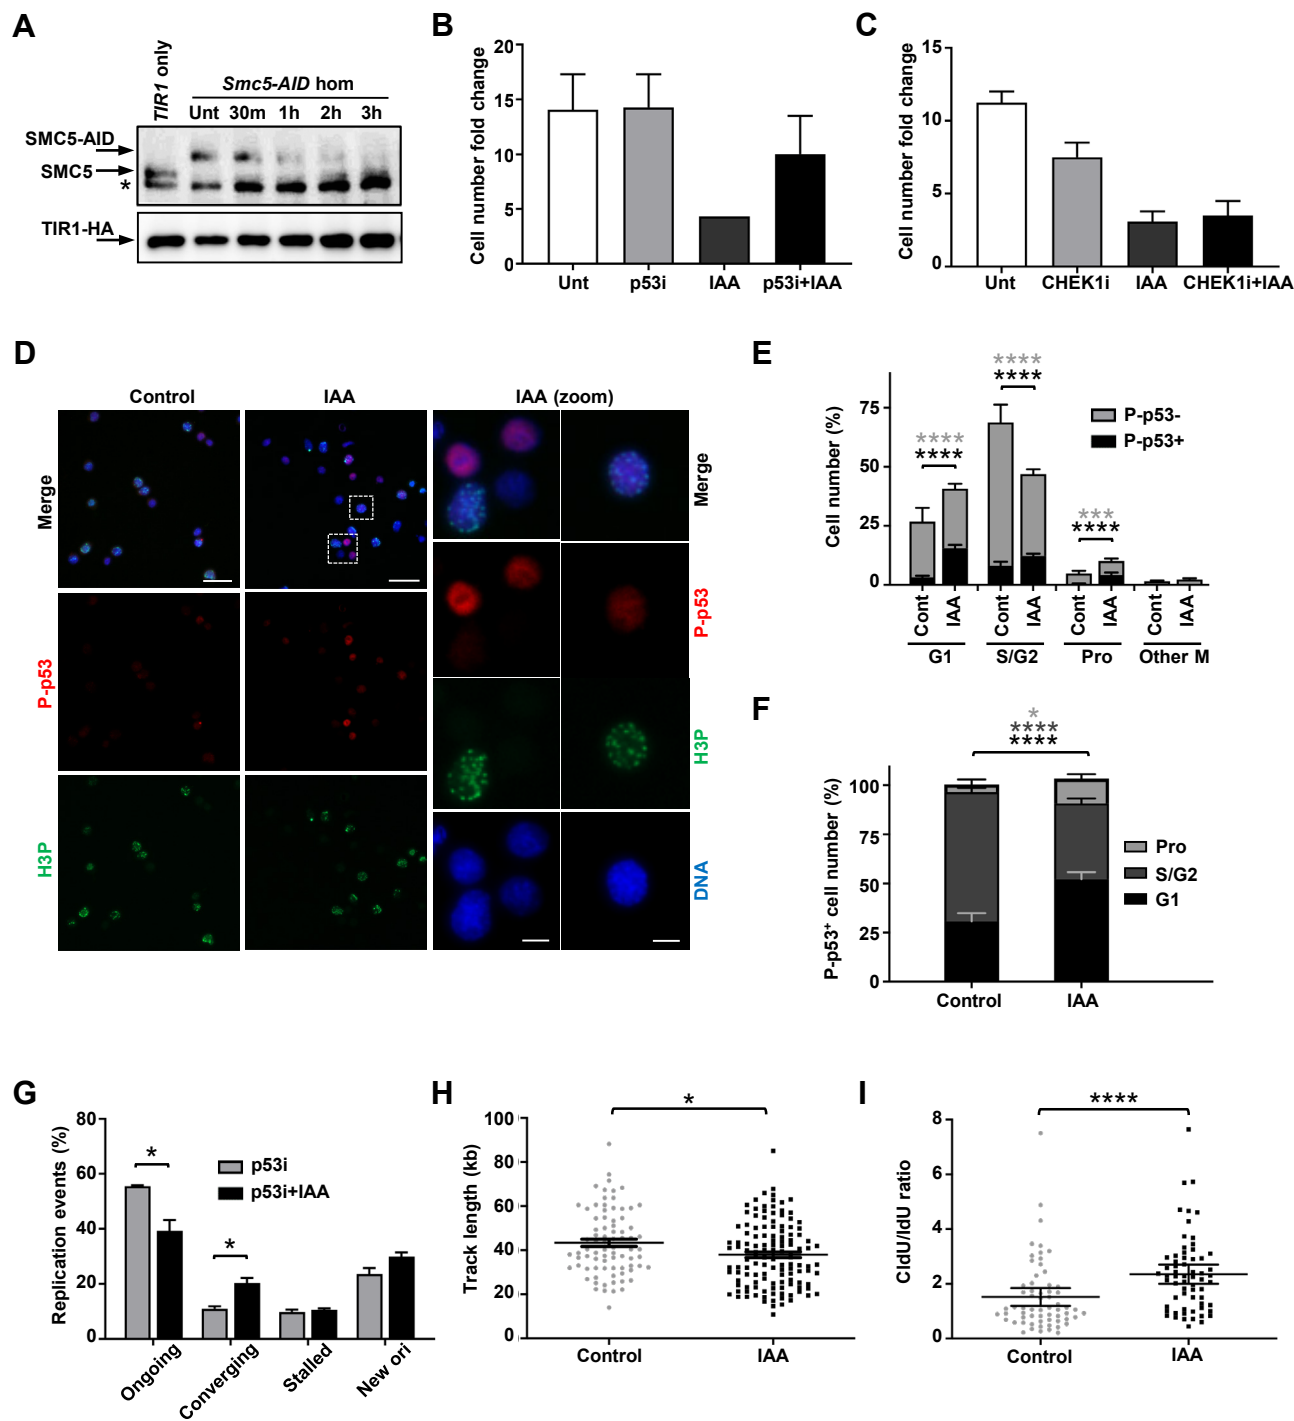

Supplement: supp [file elife_poa_e61171_Figure_5_figure_supplement_1.pdf › elife_poa_e61171_Figure_5_figure_supplement_1.pdf]

Figure 6-figure supplement 1

A

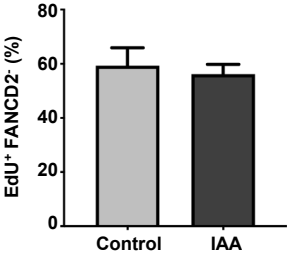

B

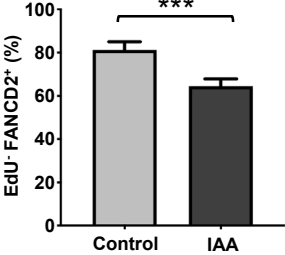

C

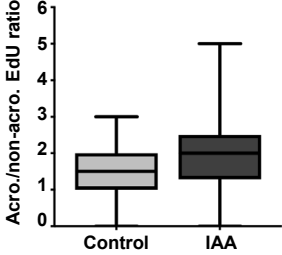

Supplement: supp [file elife_poa_e61171_Figure_6_figure_supplement_1.pdf › elife_poa_e61171_Figure_6_figure_supplement_1.pdf]
